# Supplementary material
Source: PubMed Central journal article supplement (PMC2978746)

**a**

**Soft Agar Colony Formation Assay**

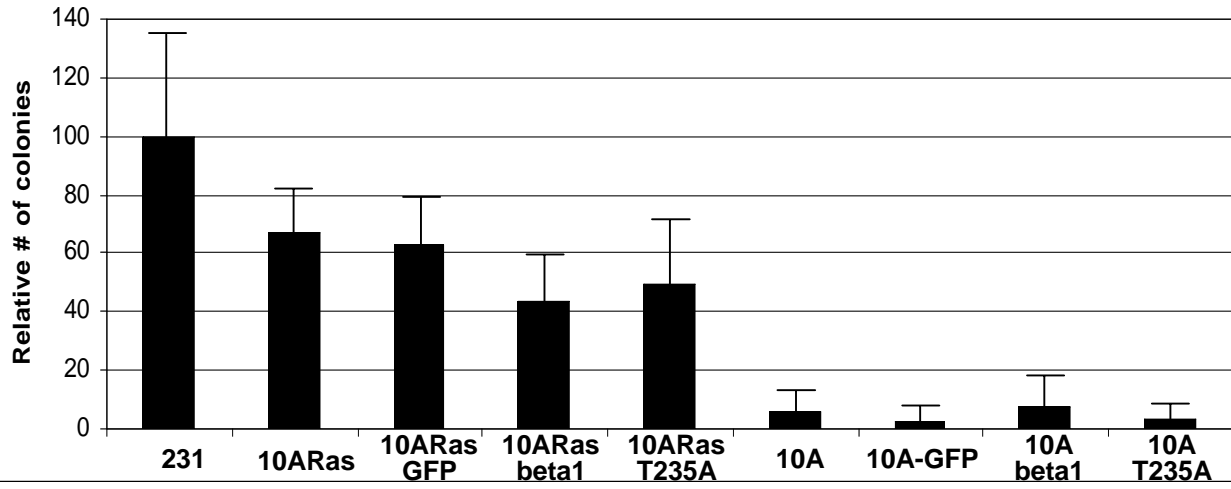

Supplement: NIHMS215755-supplement-2.pdf [file NIHMS215755-supplement-2.pdf]
